# Supplementary material for: Can the Empty Shells of Pinna nobilis Maintain the Ecological Role of the Species? A Structural and Functional Analysis of the Associated Mollusc Fauna
Source: MDPI journal article supplement (doi:10.3390/d15090956), 2023-08-24
Supplement: s1 [file s1]

**Supplementary Table S1.** Mollusc species found in *Pinna nobilis* shells with relative trophic guilds, species frequency (Dajoz's index), mean abundance and classification of presence. Trophic guild include: Suspension Feeder= SF; Deposit Feeder= DF; Grazer= G; Scavenger= S; Predator= P; Parasite= PA. According to the Dajoz index molluscs were classified as Rare= R (less than 12%), Not Common= NC (13-24%), Common= C (25-49%), Very Common= VC (50-74%) and Constant= CO (75-100%).

| Species                          | Trophic guild | Dajoz's index (%) | Mean abundance | Presence |
|----------------------------------|---------------|-------------------|----------------|----------|
| <i>Rocellaria dubia</i>          | SF            | 92.31             | 13.31          | CO       |
| <i>Hiatella arctica</i>          | SF            | 84.62             | 5.31           | CO       |
| <i>Mimachlamys varia</i>         | SF            | 84.62             | 3.00           | CO       |
| <i>Hexaplex trunculus</i>        | S; P          | 76.92             | 1.23           | CO       |
| <i>Modiolula phaseolina</i>      | SF            | 69.23             | 13.15          | VC       |
| <i>Musculus subpictus</i>        | SF            | 69.23             | 3.85           | VC       |
| <i>Rhyssoplax olivacea</i>       | G             | 69.23             | 2.00           | VC       |
| <i>Anomia ephippium</i>          | SF            | 53.85             | 2.08           | VC       |
| <i>Arca noae</i>                 | SF            | 53.85             | 3.15           | VC       |
| <i>Bittium latreilli</i>         | G             | 53.85             | 1.69           | VC       |
| <i>Bittium scabrum</i>           | G             | 53.85             | 1.69           | VC       |
| <i>Diodora graeca</i>            | DF; G         | 53.85             | 0.85           | VC       |
| <i>Odostomia turrita</i>         | PA            | 53.85             | 0.92           | VC       |
| <i>Pusillina philippi</i>        | G             | 53.85             | 1.23           | VC       |
| <i>Spiralina alpinoligustica</i> | PA            | 53.85             | 3.23           | VC       |
| <i>Tritia incrassata</i>         | S             | 53.85             | 0.69           | VC       |
| <i>Jujubinus exasperatus</i>     | DF; G; S      | 46.15             | 0.54           | C        |
| <i>Kurtiella bidentata</i>       | SF; DF        | 46.15             | 0.85           | C        |
| <i>Costulopsis buzzurroi</i>     | P             | 38.46             | 0.38           | C        |
| <i>Irus irus</i>                 | SF            | 38.46             | 1.00           | C        |
| <i>Megastomia conoidea</i>       | PA            | 38.46             | 3.62           | C        |
| <i>Parthenina interstincta</i>   | PA            | 38.46             | 2.08           | C        |
| <i>Auristomia erjaveciana</i>    | PA            | 30.77             | 0.77           | C        |
| <i>Bittium reticulatum</i>       | G             | 30.77             | 0.85           | C        |
| <i>Chama gryphoides</i>          | SF            | 30.77             | 0.38           | C        |
| <i>Clanculus cruciatus</i>       | DF; G         | 30.77             | 1.08           | C        |
| <i>Crisilla semistriata</i>      | DF; G         | 30.77             | 1.46           | C        |
| <i>Loripinus fragilis</i>        | SF            | 30.77             | 1.15           | C        |
| <i>Odostomia improbabilis</i>    | PA            | 30.77             | 0.62           | C        |
| <i>Ostrea edulis</i>             | SF            | 30.77             | 2.00           | C        |
| <i>Striarca lactea</i>           | SF            | 30.77             | 0.85           | C        |

| Species                           | Trophic guild | Dajoz's index (%) | Mean abundance | Classification |
|-----------------------------------|---------------|-------------------|----------------|----------------|
| <i>Caecum trachea</i>             | DF            | 23.08             | 0.38           | NC             |
| <i>Cerithidium submammillatum</i> | G             | 23.08             | 0.38           | NC             |
| <i>Gouldia minima</i>             | SF            | 23.08             | 0.31           | NC             |
| <i>Mangelia costata</i>           | P             | 23.08             | 0.54           | NC             |
| <i>Muricopsis cristata</i>        | P             | 23.08             | 0.31           | NC             |
| <i>Mytilus galloprovincialis</i>  | SF            | 23.08             | 0.46           | NC             |
| <i>Nucula nucleus</i>             | DF            | 23.08             | 0.77           | NC             |
| <i>Odostomia unidentata</i>       | PA            | 23.08             | 1.46           | NC             |
| <i>Rhyssoplax corallina</i>       | G             | 23.08             | 0.54           | NC             |
| <i>Steromphala albida</i>         | DF; G         | 23.08             | 1.31           | NC             |
| <i>Tritia varicosa</i>            | DF; S         | 23.08             | 0.38           | NC             |
| <i>Abra alba</i>                  | SF; DF        | 15.38             | 0.23           | NC             |
| <i>Alvania cimex</i>              | DF            | 15.38             | 0.15           | NC             |
| <i>Alvania geryonia</i>           | DF            | 15.38             | 0.15           | NC             |
| <i>Barbatia barbata</i>           | SF            | 15.38             | 0.23           | NC             |
| <i>Bolinus brandaris</i>          | DF            | 15.38             | 0.31           | NC             |
| <i>Calliostoma zizyphinum</i>     | DF            | 15.38             | 0.15           | NC             |
| <i>Chamelea gallina</i>           | SF            | 15.38             | 0.15           | NC             |
| <i>Parthenina suturalis</i>       | PA            | 15.38             | 0.15           | NC             |
| <i>Clanculus corallinus</i>       | DF; G         | 15.38             | 0.38           | NC             |
| <i>Crepidula unguiformis</i>      | SF; DF        | 15.38             | 0.15           | NC             |
| <i>Flexopecten glaber</i>         | SF            | 15.38             | 0.15           | NC             |
| <i>Gastrana fragilis</i>          | SF; DF        | 15.38             | 0.15           | NC             |
| <i>Hiatella rugosa</i>            | SF            | 15.38             | 0.38           | NC             |
| <i>Lithophaga lithophaga</i>      | SF            | 15.38             | 0.23           | NC             |
| <i>Loripes orbiculatus</i>        | SF            | 15.38             | 0.23           | NC             |
| <i>Manzonina crassa</i>           | DF; G         | 15.38             | 1.23           | NC             |
| <i>Modiolus barbatus</i>          | SF            | 15.38             | 0.15           | NC             |
| <i>Moerella donacina</i>          | SF; DF        | 15.38             | 0.15           | NC             |
| <i>Ocenebra erinaceus</i>         | P             | 15.38             | 0.15           | NC             |
| <i>Pseudofusus rostratus</i>      | P             | 15.38             | 0.15           | NC             |
| <i>Acanthochitona crinita</i>     | DF; G         | 7.69              | 0.08           | R              |
| <i>Bittium sp.</i>                | G             | 7.69              | 0.08           | R              |
| <i>Bolma rugosa</i>               | DF; G         | 7.69              | 0.08           | R              |
| <i>Calyptraea chinensis</i>       | SF            | 7.69              | 0.08           | R              |
| <i>Cerithiopsis sp.</i>           | P             | 7.69              | 0.08           | R              |

| <b>Species</b>                   | <b>Trophic guild</b> | <b>Dajoz's index (%)</b> | <b>Mean abundance</b> | <b>Classification</b> |
|----------------------------------|----------------------|--------------------------|-----------------------|-----------------------|
| <i>Columbella rustica</i>        | G; P                 | 7.69                     | 0.08                  | R                     |
| <i>Dosinia lupinus</i>           | SF                   | 7.69                     | 0.15                  | R                     |
| <i>Euthria cornea</i>            | P                    | 7.69                     | 0.08                  | R                     |
| <i>Haliotis tuberculata</i>      | G                    | 7.69                     | 0.08                  | R                     |
| <i>Hyala vitrea</i>              | DF; G                | 7.69                     | 0.08                  | R                     |
| <i>Ischnochiton rissoi</i>       | G                    | 7.69                     | 0.08                  | R                     |
| <i>Limaria hians</i>             | SF                   | 7.69                     | 0.08                  | R                     |
| <i>Limaria tuberculata</i>       | SF                   | 7.69                     | 0.08                  | R                     |
| <i>Liostomia clavula</i>         | PA                   | 7.69                     | 0.08                  | R                     |
| <i>Lucinella divaricata</i>      | DF                   | 7.69                     | 0.08                  | R                     |
| <i>Mangelia costulata</i>        | P                    | 7.69                     | 0.08                  | R                     |
| <i>Mangelia taeniata</i>         | P                    | 7.69                     | 0.08                  | R                     |
| <i>Mangelia unifasciata</i>      | P                    | 7.69                     | 0.15                  | R                     |
| <i>Monophorus thiriotae</i>      | P                    | 7.69                     | 0.08                  | R                     |
| <i>Ocenebra edwardsii</i>        | P                    | 7.69                     | 0.23                  | R                     |
| <i>Odostomia lukisii</i>         | PA                   | 7.69                     | 0.08                  | R                     |
| <i>Papillicardium papillosum</i> | SF                   | 7.69                     | 0.08                  | R                     |
| <i>Parthenina emaciata</i>       | PA                   | 7.69                     | 0.08                  | R                     |
| <i>Peronaea planata</i>          | DF                   | 7.69                     | 0.08                  | R                     |
| <i>Pitar rudis</i>               | SF                   | 7.69                     | 0.08                  | R                     |
| <i>Polititapes aureus</i>        | SF                   | 7.69                     | 0.15                  | R                     |
| <i>Pusillina inconspicua</i>     | DF; G                | 7.69                     | 0.08                  | R                     |
| <i>Rissoa splendida</i>          | DF; G                | 7.69                     | 0.08                  | R                     |
| <i>Steromphala adansonii</i>     | DF; G                | 7.69                     | 0.08                  | R                     |
| <i>Timoclea ovata</i>            | SF                   | 7.69                     | 0.08                  | R                     |
| <i>Tricolia tenuis</i>           | G                    | 7.69                     | 0.08                  | R                     |
| <i>Tritia mutabilis</i>          | DF; G                | 7.69                     | 0.08                  | R                     |
| <i>Tritia sp.</i>                | DF; G                | 7.69                     | 0.08                  | R                     |
| <i>Varicorbula gibba</i>         | SF                   | 7.69                     | 0.08                  | R                     |
| <i>Venus casina</i>              | SF                   | 7.69                     | 0.08                  | R                     |
| <i>Venus verrucosa</i>           | SF                   | 7.69                     | 0.08                  | R                     |
| <i>Vitreolina curva</i>          | PA                   | 7.69                     | 0.08                  | R                     |

**Supplementary Table S2.** Mollusc abundances per traits matrix of the thirteen dead specimens of *Pinna nobilis* collected at the four sites in the Gulf of Trieste: M(Miramare), S (S.Pietro), P (Panzano) and B (Barcola).

| Trait              | Category                              | Labels      | Sample |    |     |    |    |    |    |    |    |    |    |    |     |
|--------------------|---------------------------------------|-------------|--------|----|-----|----|----|----|----|----|----|----|----|----|-----|
|                    |                                       |             | M1     | M2 | M3  | S1 | S2 | S3 | S4 | P1 | P2 | P3 | B1 | B2 | B3  |
| Adult maximum size | Very small (< 5 mm)                   | < 5 mm      | 0      | 10 | 7   | 0  | 2  | 18 | 8  | 5  | 23 | 29 | 32 | 46 | 82  |
|                    | Small (5-30 mm)                       | 5-30 mm     | 77     | 36 | 95  | 19 | 12 | 52 | 35 | 24 | 48 | 77 | 55 | 81 | 114 |
|                    | Medium (30-80 mm)                     | 30-80 mm    | 12     | 12 | 22  | 9  | 13 | 10 | 5  | 8  | 10 | 3  | 15 | 21 | 16  |
|                    | Large (> 80 mm)                       | > 80 mm     | 17     | 7  | 15  | 3  | 6  | 3  | 3  | 0  | 2  | 1  | 3  | 4  | 3   |
| Adult longevity    | Very short (< 1 yr)                   | < 1 yr      | 0      | 0  | 0   | 0  | 0  | 0  | 0  | 0  | 0  | 0  | 0  | 0  | 0   |
|                    | Short (1-3 yr)                        | 1-3 yr      | 1      | 1  | 3   | 0  | 1  | 4  | 1  | 0  | 3  | 13 | 12 | 20 | 22  |
|                    | Intermediate (3-6 yr)                 | 3-6 yr      | 78     | 42 | 90  | 20 | 19 | 43 | 37 | 22 | 42 | 33 | 51 | 53 | 57  |
|                    | Long (6-10 yr)                        | 6-10 yr     | 80     | 43 | 98  | 17 | 14 | 39 | 30 | 22 | 53 | 75 | 57 | 92 | 103 |
| Mobility           | Sessile                               | Ses         | 69     | 36 | 87  | 8  | 6  | 30 | 14 | 19 | 48 | 68 | 37 | 83 | 84  |
|                    | Semi-motile                           | Se-mot      | 7      | 6  | 21  | 9  | 10 | 15 | 17 | 12 | 9  | 10 | 18 | 12 | 15  |
|                    | Motile                                | Mot         | 27     | 23 | 27  | 10 | 12 | 34 | 17 | 7  | 25 | 33 | 44 | 53 | 110 |
| Feeding habit      | Suspension feeder                     | SF          | 75     | 40 | 103 | 12 | 14 | 44 | 27 | 29 | 54 | 77 | 47 | 89 | 91  |
|                    | Surface deposit feeder                | SDF         | 72     | 29 | 54  | 11 | 9  | 19 | 21 | 5  | 26 | 10 | 22 | 29 | 40  |
|                    | Sub surface deposit feeder            | SSDF        | 48     | 16 | 40  | 7  | 3  | 5  | 9  | 4  | 24 | 8  | 12 | 14 | 9   |
|                    | Grazer                                | G           | 18     | 15 | 17  | 3  | 5  | 29 | 9  | 5  | 6  | 5  | 16 | 23 | 60  |
|                    | Scavenger                             | SC          | 3      | 3  | 4   | 3  | 5  | 2  | 4  | 1  | 2  | 1  | 4  | 4  | 3   |
|                    | Predator                              | PR          | 8      | 0  | 7   | 8  | 7  | 3  | 3  | 1  | 3  | 2  | 11 | 5  | 6   |
|                    | Parasite                              | PA          | 0      | 8  | 4   | 1  | 1  | 1  | 0  | 3  | 18 | 27 | 24 | 33 | 53  |
| Living habit       | Free living                           | Fre-liv     | 32     | 26 | 35  | 11 | 20 | 44 | 20 | 17 | 28 | 38 | 49 | 46 | 109 |
|                    | Burrow dwelling                       | Bur-dwe     | 1      | 1  | 7   | 8  | 4  | 12 | 15 | 5  | 2  | 8  | 14 | 8  | 9   |
|                    | Crevices/hole/under stones            | Cre-hol-uns | 52     | 24 | 57  | 8  | 7  | 22 | 14 | 14 | 33 | 29 | 34 | 50 | 48  |
|                    | Epi-endobiotic/Attached to substratum | Epi-end-Att | 76     | 43 | 101 | 11 | 15 | 36 | 18 | 28 | 55 | 70 | 49 | 93 | 96  |

**Supplementary Table S3.** Mollusc biomasses (g SFWW) per traits matrix of the thirteen dead specimens of *Pinna nobilis* collected at the four sites in the Gulf of Trieste: M(Miramare), S (S.Pietro), P (Panzano) and B (Barcola).

| Trait              | Category                              | Labels      | Sample |      |       |      |       |      |      |      |      |      |      |      |      |
|--------------------|---------------------------------------|-------------|--------|------|-------|------|-------|------|------|------|------|------|------|------|------|
|                    |                                       |             | M1     | M2   | M3    | S1   | S2    | S3   | S4   | P1   | P2   | P3   | B1   | B2   | B3   |
| Adult maximum size | Very small (< 5 mm)                   | < 5 mm      | 0.00   | 0.00 | 0.00  | 0.00 | 0.00  | 0.01 | 0.00 | 0.00 | 0.01 | 0.01 | 0.01 | 0.02 | 0.04 |
|                    | Small (5-30 mm)                       | 5-30 mm     | 2.22   | 1.20 | 4.26  | 0.45 | 0.08  | 0.58 | 0.23 | 0.40 | 1.11 | 0.43 | 1.03 | 0.91 | 1.00 |
|                    | Medium (30-80 mm)                     | 30-80 mm    | 3.19   | 2.34 | 12.43 | 5.65 | 16.28 | 5.75 | 8.21 | 5.06 | 4.96 | 4.32 | 1.65 | 0.82 | 8.98 |
|                    | Large (> 80 mm)                       | > 80 mm     | 4.88   | 5.30 | 3.94  | 3.01 | 4.30  | 1.01 | 6.27 | 0.00 | 0.97 | 3.32 | 0.06 | 0.04 | 0.03 |
| Adult longevity    | Very short (< 1 yr)                   | < 1 yr      | 0.00   | 0.00 | 0.00  | 0.00 | 0.00  | 0.00 | 0.00 | 0.00 | 0.00 | 0.00 | 0.00 | 0.00 | 0.00 |
|                    | Short (1-3 yr)                        | 1-3 yr      | 0.00   | 0.01 | 0.00  | 0.00 | 0.00  | 0.48 | 0.00 | 0.00 | 0.00 | 0.01 | 0.03 | 0.08 | 0.01 |
|                    | Intermediate (3-6 yr)                 | 3-6 yr      | 9.70   | 8.26 | 12.91 | 2.53 | 8.00  | 6.76 | 2.27 | 5.14 | 4.84 | 1.30 | 1.97 | 1.15 | 9.44 |
|                    | Long (6-10 yr)                        | 6-10 yr     | 7.48   | 6.61 | 7.63  | 2.33 | 1.03  | 2.11 | 0.24 | 0.17 | 0.87 | 0.37 | 1.02 | 1.20 | 9.41 |
| Mobility           | Sessile                               | Ses         | 7.17   | 6.56 | 7.57  | 0.22 | 0.03  | 2.09 | 0.16 | 0.16 | 0.87 | 0.36 | 0.36 | 1.19 | 9.36 |
|                    | Semi-motile                           | Se-mot      | 2.35   | 1.76 | 9.51  | 0.25 | 7.87  | 5.14 | 2.10 | 5.22 | 4.24 | 1.08 | 2.07 | 0.44 | 0.49 |
|                    | Motile                                | Mot         | 0.62   | 0.52 | 0.87  | 5.54 | 9.34  | 0.11 | 6.23 | 0.09 | 0.97 | 3.33 | 0.29 | 0.15 | 0.16 |
| Feeding habit      | Suspension feeder                     | SF          | 9.50   | 8.26 | 16.69 | 0.48 | 7.90  | 7.26 | 2.25 | 5.15 | 4.87 | 1.36 | 2.24 | 1.35 | 9.48 |
|                    | Surface deposit feeder                | SDF         | 2.20   | 1.08 | 1.61  | 0.28 | 5.95  | 0.07 | 0.19 | 0.15 | 0.84 | 0.28 | 0.57 | 0.58 | 0.43 |
|                    | Sub surface deposit feeder            | SSDF        | 1.68   | 0.56 | 1.34  | 0.08 | 0.00  | 0.04 | 0.17 | 0.14 | 0.84 | 0.28 | 0.32 | 0.46 | 0.32 |
|                    | Grazer                                | G           | 0.45   | 0.54 | 0.64  | 0.10 | 4.96  | 0.02 | 0.01 | 0.31 | 0.24 | 0.08 | 0.35 | 0.39 | 0.50 |
|                    | Scavenger                             | SC          | 0.07   | 0.05 | 0.60  | 3.04 | 3.41  | 0.06 | 6.23 | 0.01 | 0.97 | 3.32 | 0.09 | 0.04 | 0.02 |
|                    | Predator                              | PR          | 0.27   | 0.00 | 0.59  | 5.48 | 4.38  | 0.07 | 6.21 | 0.08 | 0.97 | 3.32 | 0.19 | 0.04 | 0.03 |
|                    | Parasite                              | PA          | 0.00   | 0.00 | 0.00  | 0.13 | 0.08  | 0.00 | 0.00 | 0.00 | 0.00 | 0.01 | 0.01 | 0.01 | 0.02 |
| Living habit       | Free living                           | Fre-liv     | 0.62   | 0.52 | 0.87  | 5.54 | 9.33  | 0.60 | 6.23 | 0.09 | 0.98 | 3.33 | 0.30 | 0.16 | 0.18 |
|                    | Burrow dwelling                       | Bur-dwe     | 0.00   | 0.00 | 0.08  | 0.17 | 0.01  | 0.01 | 0.10 | 0.01 | 0.01 | 0.00 | 0.78 | 0.16 | 0.13 |
|                    | Crevices/hole/under stones            | Cre-hol-uns | 1.73   | 1.15 | 2.10  | 0.23 | 0.11  | 0.08 | 0.16 | 0.38 | 1.09 | 0.38 | 0.64 | 1.43 | 9.65 |
|                    | Epi-endobiotic/Attached to substratum | Epi-end-Att | 9.64   | 8.33 | 17.00 | 0.44 | 7.99  | 7.23 | 2.16 | 5.38 | 5.10 | 1.44 | 1.65 | 1.48 | 9.76 |

**Table S4.** Linear and Logarithmic regression models used to describe the relationships between species richness and functional richness (FRic).

| Model                           | F     | df   | P value | r <sup>2</sup> |
|---------------------------------|-------|------|---------|----------------|
| Functional richness linear      | 4.528 | 1,11 | 0.0567  | 0.2272         |
| Functional richness logarithmic | 1.596 | 1,11 | 0.2326  | 0.0472         |

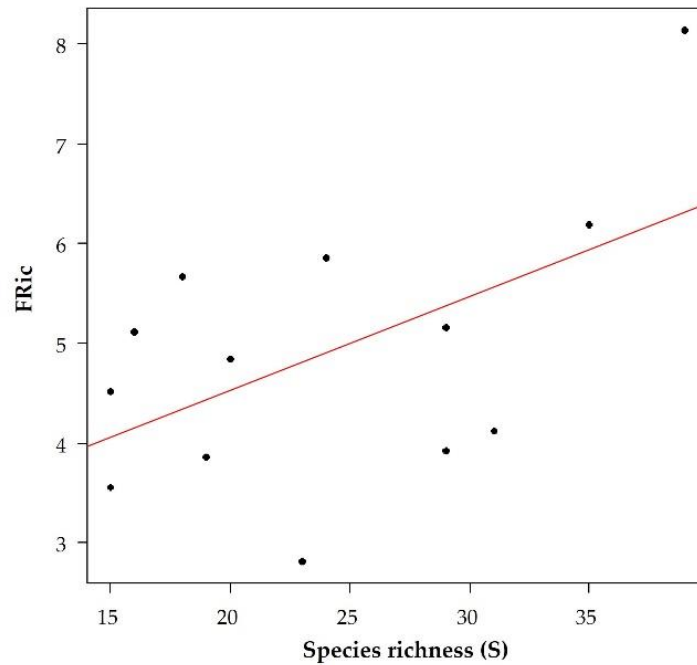

**Figure S1.** Linear regression between functional richness (FRic) and species richness (S) of mollusc assemblage on *P.nobilis* shells in the Gulf of Trieste
